# Supplementary material
Source: ML conference proceedings conference paper supplement (https://proceedings.neurips.cc/paper_files/paper/2019/hash/5e2b66750529d8ae895ad2591118466f-Abstract.html)
Supplement: Supplementary file [file 5e2b66750529d8ae895ad2591118466f-Supplemental.zip]

---

# Paraphrase Generation with Latent Bag of Words

## Appendix

---

Anonymous Author(s)

Affiliation

Address

email

### 1 Experiments setup

#### 1.1 Data Preprocessing

**The Quora Dataset.** This dataset is originally used for duplicated question detection<sup>1</sup>. The original dataset labels question pairs as duplicated or not. We extract all pairs labeled as duplicated. We use 50K of the extracted pairs as the training set, 20K as the test set, and abandon the rest. We truncate the maximum sentence length to be 16. We set word with occurrence less than 5 to be “UNK”. Only content words (nouns, verbs, adverbs, and adjectives) are used in bag of words prediction. Non-content words (pronouns, prepositions, conjunctions, and punctuation) are not used in the latent BOW model. The maximum size of the target BOW set is 11. The sample size is also 11. Larger sample size will give the decoder more flexibility about word choice, while smaller sample size will give the decoder more certainty. The vocabulary size is 8K. Compared with the MSCOCO dataset, the upside of this dataset is that sentences from this dataset are labeled to be paraphrases by human annotators. The downside of this dataset is that we only have one target sentence, while the MSCOCO dataset has multiple target sentences. Despite the downside, this dataset is informative enough for the model to learn meaningful paraphrases.

**The MSCOCO Dataset.** This dataset is originally used for image captioning. The sentences are written by human annotators to describe the objects in the image. There are five annotations for each image. Generally, these annotations are paraphrases to each other because they all describe the same image. However, they are not guaranteed to be paraphrases because different annotations may describe different objects in the image, e.g. if there is a table and a chair in the image, one caption may be about the table, another may be about the chair. In training, we loop over the five sentence, using the  $i$ th as the source sentence, the  $i + 1$ th as the target sentence, and all words in the 5 sentences except the source words as the target BOW. The maximum sentence length is 16. The maximum size of the target BOW is 25, and we sample 10 words from the predicted BOW. In evaluation, we use one of the five sentences as the input, and the rest four sentences as the references for computing BLEU and ROUGE. There are 94K training instances and 23K testing instances. The vocabulary size is 11K. Although sentences are not guaranteed to be paraphrases, they generally are. So this is also a meaningful dataset for the paraphrase generation task.

#### 1.2 Model Architecture, Hyper-parameters, and Training

For the encoder, we use a two-layer residual LSTM. The decoder is also a two-layer residual LSTM. We find out that the residual connections significantly speed up the convergence. Each LSTM’s state size is 500, and so is the word embedding size. The prediction of word neighbor is similar to a sequence tagging model. For each source word, we use three separate softmax layers on top of the LSTM output to predict their three neighbors. The three softmax may output the same neighbor, if

---

<sup>1</sup><https://www.kaggle.com/aymenmouelhi/quora-duplicate-questions>

there is not so many neighbors in the training set. The number of neighbors for a given word in a dataset is an intrinsic property of this dataset, and our model discovers this in an unsupervised way.

Sampling from the predicted neighbor is achieved by the gumbel-topk trick. The temperature parameter of the gumbel-topk is set to be 1. The embeddings of the sampled words are retrieved from the embedding table, and re-weighted by their corresponding probability in the bag of words distribution. The weighted average of the word embeddings are then added to the encoder’s last hidden state, and used as the decoder’s initial hidden state. During decoding, the decoder not only perform attention to the source words as a normal attentive seq2seq model, but also perform attention to the sampled BOW embeddings. We use greedy decoding in all the models.

We use the Adam optimizer for training. The learning rate is set to be 0.0008 for all models, and this number seems to be the best learning rate from our hyper-parameter search. We set dropout to be 0.6 since the model is large enough for the datasets. We find out the dropout strength and the learning rate are the two most influential hyper-parameters. We set the batch size to be 100. Each model are trained with 10 epochs, and the models with the best performance are chosen. All experiments are repeated three times with different random seeds. The average performance of the experiments are reported. The standard deviation of the numbers are smaller enough than our models’ performance gain.

Since the previous works [Li et al., 2018, Prakash et al., 2016, Gupta et al., 2018] do not release their code, we are not sure how exactly they process the data, and we cannot reproduce exactly the same results. Since our preprocessing of the dataset is different than their setting. Our reported numbers are not directly comparable to theirs. However, they are meaningful in our setting and comparable to each other.

## 2 Generation Samples

Figure 1 gives more generated sentences from the Quora dataset. Figure 2 gives more sentences from the MSCOCO dataset. Not all predicted word neighbors are meaningful and not all generated sentences are successful. But still, the overall generation quality is favorable.

Figure 3 gives more sample about controlling through the latent code. This property is not quite stable in our experiments. Changing a sampled word does not necessarily change the final output sentence since the decoder may ignore the BOW sample. Also the change of the word choice can not influence multiple words (more than three words) at present. In our experiments, we see more successful results about changing one or two words. Despite the instability, this property gives a new possibility about controllable text generation through the intermediate word choice. A future direction is to make this property more stable and controllable.

## References

- Ankush Gupta, Arvind Agarwal, Prawaan Singh, and Piyush Rai. A deep generative framework for paraphrase generation. In *AAAI*, 2018.
- Zichao Li, Xin Jiang, Lifeng Shang, and Hang Li. Paraphrase generation with deep reinforcement learning. In *EMNLP*, 2018.
- Aaditya Prakash, Sadid A. Hasan, Kathy Lee, Vivek Datla, Ashequl Qadir, Joey Liu, and Oladimeji Farri. Neural paraphrase generation with stacked residual lstm networks. In *COLING*, 2016.

|            |                                                                                                      |
|------------|------------------------------------------------------------------------------------------------------|
| Input      | what is the best path i should take to improve english                                               |
| Neighbor   | <i>best way</i><br><i>good want</i><br><i>learn improve</i><br><i>improve speaking</i>               |
| BOW sample | <i>improve, best, english, way, spoken, learn, speaking, communication, pronunciation, good</i>      |
| Output     | how can i improve my english language ?                                                              |
| Input      | what are the popular series by unk ?                                                                 |
| Neighbor   | <i>popular watch</i><br><i>best movies</i>                                                           |
| BOW sample | <i>series, popular, best, watch, tv 's, movies, kind, famous</i>                                     |
| Output     | what are some of the best movies by unk ?                                                            |
| Input      | do you think there is life on other planets ?                                                        |
| Neighbor   | <i>think life believe know</i><br><i>think life signs found</i>                                      |
| BOW sample | <i>life, think, planets, found, believe, know, sustain, signs</i>                                    |
| Output     | do you believe in life on other planets ?                                                            |
| Input      | what is the procedure to check your pf balance ?                                                     |
| Neighbor   | <i>procedure check check account</i><br><i>open know offline report</i>                              |
| BOW sample | <i>pf, check, balance, procedure, know, offline, report, account, profile, requirements, process</i> |
| Output     | how do i check my pf balance ?                                                                       |
| Input      | what role does money play in your life ?                                                             |
| Neighbor   | <i>role much play life</i><br><i>role money played life</i>                                          |
| BOW sample | <i>life, play, role, money, played, like, would, importance</i>                                      |
| Output     | what is the role of money in your life ?                                                             |
| Input      | what is the bad thing about quora ?                                                                  |
| Neighbor   | <i>bad thing quora</i><br><i>bad things quora</i>                                                    |
| BOW sample | <i>quora, bad, thing, things, best, answer, life, good</i>                                           |
| Output     | what is the most thing to quora ?                                                                    |

Figure 1: More sentence generation samples from the Quora dataset

|            |                                                                                                      |
|------------|------------------------------------------------------------------------------------------------------|
| Input      | Two people walking their dogs on a beach                                                             |
| Neighbor   | <i>men walking dogs sand</i><br><i>couple walk dog beach</i>                                         |
| BOW sample | <i>people, beach, walking, water, couple, dogs, carrying, walk, ocean</i>                            |
| Output     | Two people walking on the beach with their dogs                                                      |
| Input      | A woman eating a piece of pastry in a market area                                                    |
| Neighbor   | <i>woman food slice donut store street</i><br><i>young bite eating doughnut shopping outdoor</i>     |
| BOW sample | <i>eating, woman, bite, doughnut, pastry, donut, taking, holding, piece, slice, food</i>             |
| Output     | A woman eating a piece of food in a market                                                           |
| Input      | There is a bus with several people standing next to it                                               |
| Neighbor   | <i>transit driving people people bus</i><br><i>parked street passengers standing parked</i>          |
| BOW sample | <i>bus, people, parked, standing, next, street, waiting, passengers</i>                              |
| Output     | A group of people standing next to a bus                                                             |
| Input      | A man on a snow board jumps off a snow hill                                                          |
| Neighbor   | <i>man snowy snowboard air hill slope</i><br><i>person slope board jumping snowboard hill</i>        |
| BOW sample | <i>man, jumping, air, snow, snowboard, board, person, hill, jump, snowboarder</i>                    |
| Output     | A man on a snowboard jumping over a hill                                                             |
| Input      | A large propeller airplane flying through a foggy sky                                                |
| Neighbor   | <i>large propeller airplane sky fog flying</i><br><i>large airplane propeller plane cloudy clear</i> |
| BOW sample | <i>flying, plane, airplane, air, sky, large, propeller, cloudy, flies, blue</i>                      |
| Output     | A large airplane flying through a cloudy sky                                                         |
| Input      | A group of young people playing video games                                                          |
| Neighbor   | <i>group people people holding remote video</i><br><i>group young group standing room game</i>       |
| BOW sample | <i>game, group, people, video, playing, young, Wii, standing, Nintendo, games</i>                    |
| Output     | A group of people playing a game with remote controllers                                             |

Figure 2: More sentence generation samples from the MSCOCO dataset

|              |                                                                          |
|--------------|--------------------------------------------------------------------------|
| Input        | A motorcycle parked in a parking space next to another motorcycle        |
| BOW sample 1 | motorcycle lot                                                           |
| Output 1     | A motorcycle parked in a parking lot next to a building                  |
| BOW sample 2 | motorcycle lot <i>another</i>                                            |
| Output 2     | A motorcycle parked next to <i>another</i> motorcycle in a parking lot   |
| Input        | A baseball player is swinging at a baseball                              |
| BOW sample 1 | baseball people                                                          |
| Output 1     | A baseball player is swinging at a ball                                  |
| BOW sample 2 | baseball people <i>ready</i>                                             |
| Output 2     | A baseball player is getting <i>ready</i> to catch a ball                |
| Input        | A group of young people playing video games                              |
| BOW sample 1 | playing group game <i>men</i>                                            |
| Output 1     | A group of young <i>men</i> playing a game with Nintendo Wii controllers |
| BOW sample 2 | playing group game <i>people</i>                                         |
| Output 2     | A group of <i>people</i> playing a game with Nintendo Wii controllers    |
| Input        | A teenaged boy prepares to hit a tennis ball with a forehand shot        |
| BOW sample 1 | tennis <i>racquet</i>                                                    |
| Output 1     | A young boy holding a tennis <i>racquet</i> on a tennis court            |
| BOW sample 2 | tennis holding <i>racket ball</i>                                        |
| Output 2     | A young boy is holding a tennis <i>racket</i> and <i>ball</i>            |
| Input        | A brown bear looking up to the sky while smiling                         |
| BOW sample 1 | standing bear brown <i>field</i>                                         |
| Output 1     | A brown bear standing on top of a lush green <i>field</i>                |
| BOW sample 2 | brown bear <i>looking</i>                                                |
| Output 2     | A brown bear standing in the grass <i>looking</i> at something           |
| Input        | people built a dog house shaped sand castle                              |
| BOW sample 1 | dog men sitting                                                          |
| Output 1     | A dog is standing in front of a large building                           |
| BOW sample 2 | people men dog People                                                    |
| Output 2     | A dog is standing in front of a large building                           |

Figure 3: More sentence samples from the latent code.
